# Supplementary material for: Spatially organizing biochemistry: choosing a strategy to translate synthetic biology to the factory
Source: PubMed Central journal article supplement (PMC5974357; doi:10.1038/s41598-018-26399-0), 2018-05-29
Supplement: 41598_2018_26399_MOESM1_ESM.pdf [file 41598_2018_26399_MOESM1_ESM.pdf]

1 **Supplemental Information**

2 To accompany: Spatially organizing biochemistry: choosing a strategy to translate  
3 synthetic biology to the factory

4 Christopher M. Jakobson, Danielle Tullman-Ercek, Niall M. Mangan

5

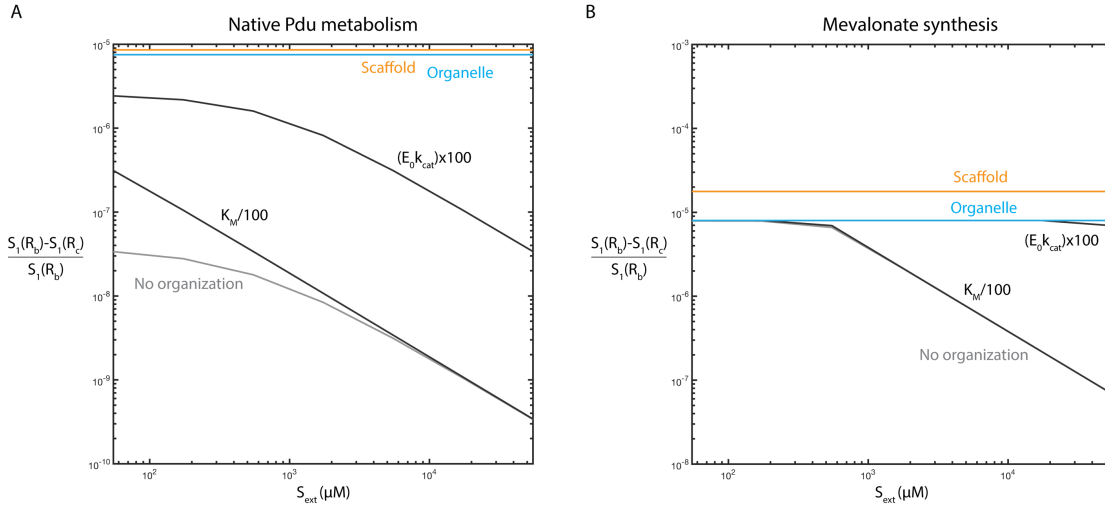

6

7 **Figure S1.** Concentration gradient across the cytosol, defined as the relative change in  
 8 the concentration of  $S_I$  from the outer edge ( $R_b$ ) to the inner edge ( $R_c$ ) of the cytosol, for  
 9 (A) native Pdu metabolism and (B) mevalonate synthesis for each of five organization  
 10 cases we consider (see Fig. 2CD) as a function of external  $S_I$  concentration ( $S_{ext}$ ). In no  
 11 case does the relative gradient exceed  $10^{-4}$  for any  $S_{ext}$ .

12

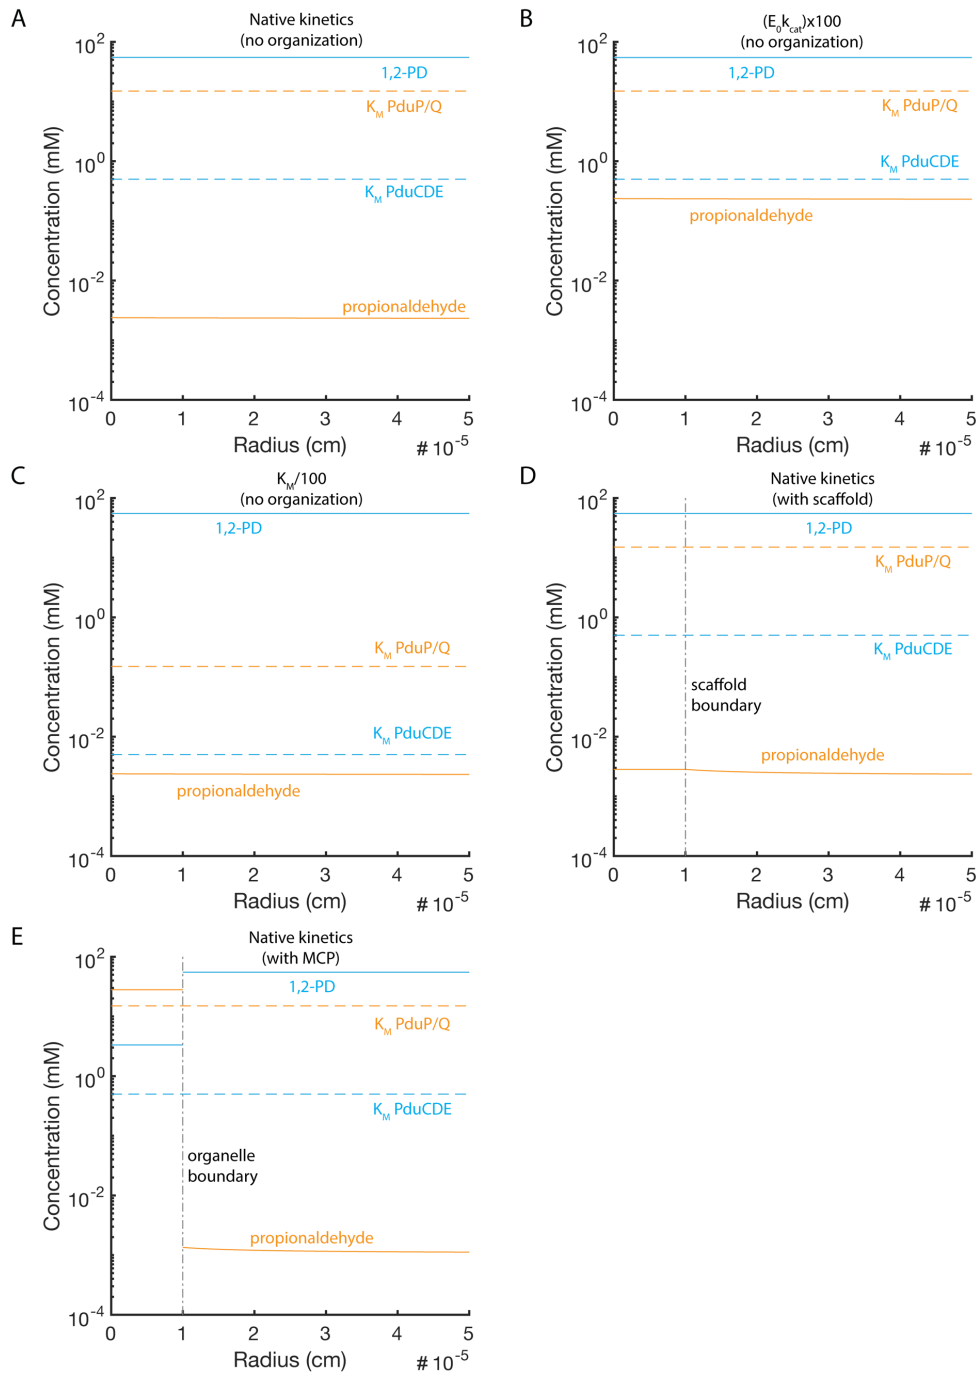

13

14 **Figure S2.** Concentration profiles as a function of cell radius for native Pdu metabolism  
 15 assuming (A) native kinetics without organization; (B) 100-fold improvement of  $k_{cat}$  for  
 16 both pathway enzymes; (C) 100-fold improvement in  $K_M$  for both pathway enzymes; (D)  
 17 native kinetics with organization on a scaffold; and (E) native kinetics with organization

18 in a microcompartment organelle. 1,2-propanediol (blue) and propionaldehyde (orange)  
19 concentrations are shown in solid lines;  $K_M$  values for PduCDE (blue) and PduP/Q  
20 (orange) are shown in dashed lines. The organelle boundary is shown in a black dashed  
21 line where relevant.

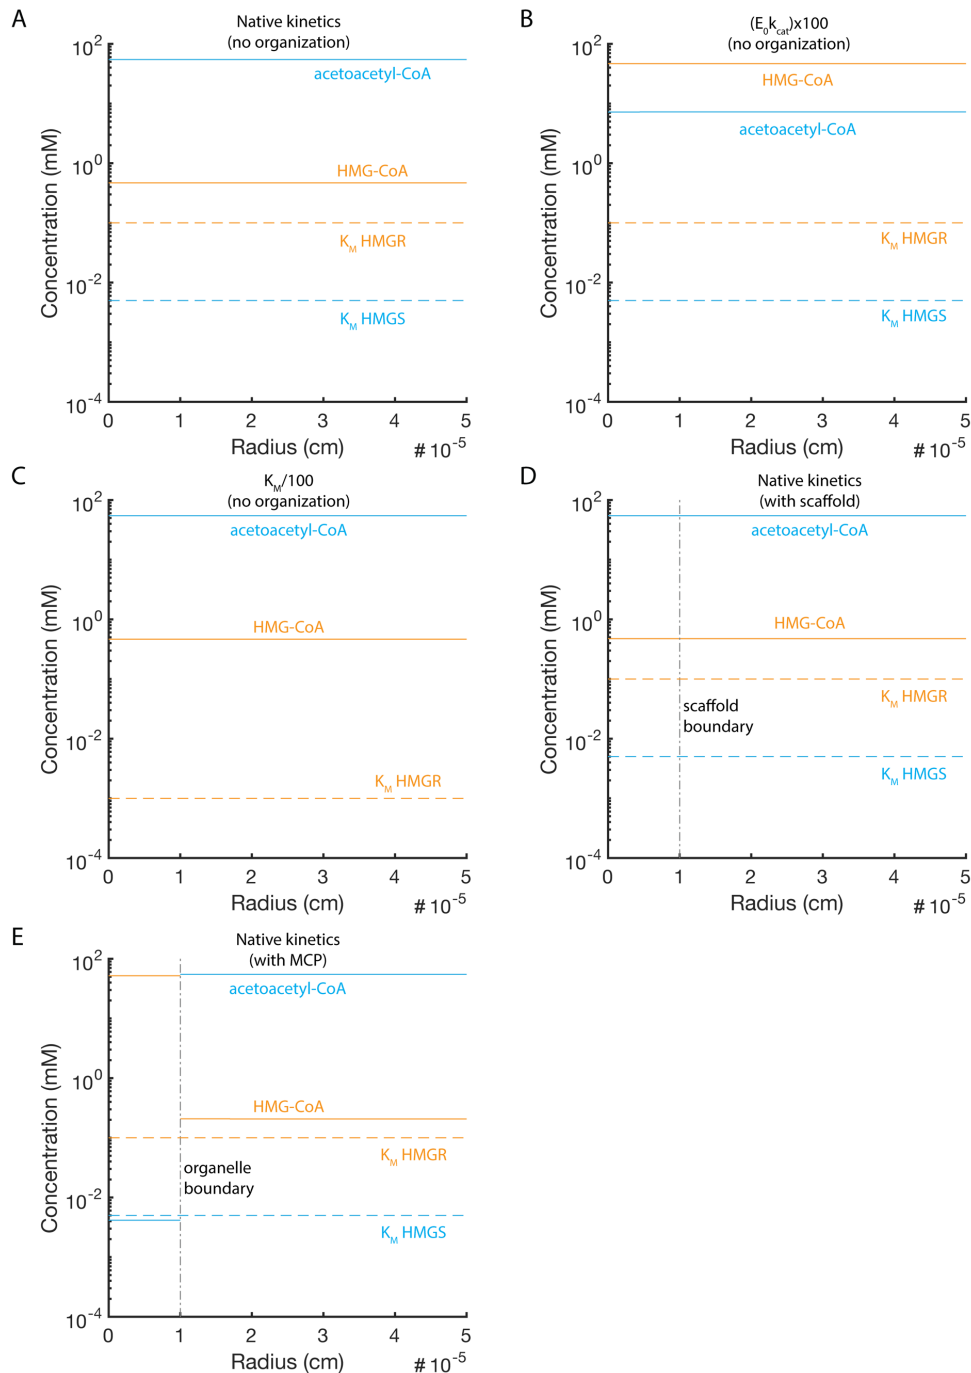

22

23 **Figure S3.** Concentration profiles as a function of cell radius for mevalonate synthesis  
 24 assuming (A) native kinetics without organization; (B) 100-fold improvement of  $k_{cat}$  for  
 25 both pathway enzymes; (C) 100-fold improvement in  $K_M$  for both pathway enzymes; (D)  
 26 native kinetics with organization on a scaffold; and (E) native kinetics with organization

27 in a microcompartment organelle. Acetoacetyl-CoA (blue) and HMG-CoA (orange)  
28 concentrations are shown in solid lines;  $K_M$  values for HMGS (blue) and HMGR (orange)  
29 are shown in dashed lines. The organelle boundary is shown in a black dashed line where  
30 relevant.  
31

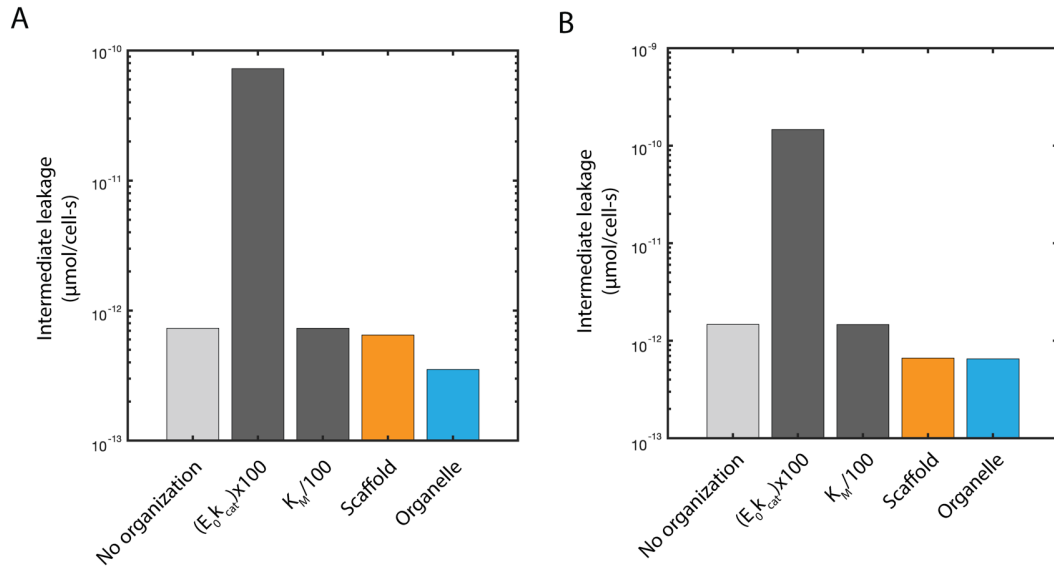

32

33 **Figure S4.** Predicted rate of intermediate leakage into the extracellular space for (A)

34 native Pdu microcompartment metabolism and (B) mevalonate biosynthesis for native

35 kinetics without organization; 100-fold improvement of  $k_{cat}$  for both pathway enzymes;

36 100-fold improvement in  $K_M$  for both pathway enzymes; native kinetics with organization

37 on a scaffold; and native kinetics with organization in a microcompartment organelle.

38 The predictions here are based on an external substrate concentration of 50 mM 1,2-

39 propanediol, as is typically used in experiments (Sampson and Bobik, 2008).

40

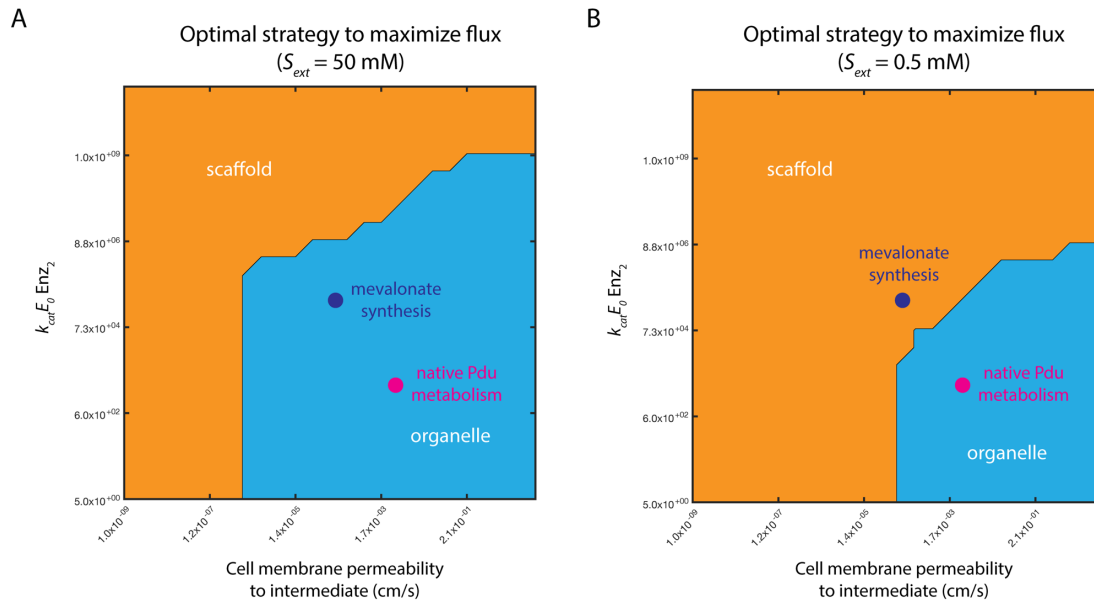

41

42 **Figure S5.** Predicted optimal organizational strategy for native Pdu microcompartment  
 43 metabolism (magenta) and mevalonate biosynthesis (purple) as a function of the  
 44 abundance and kinetics of the second pathway enzyme  $k_{cat}E_0$  (PduP/Q and HMGR,  
 45 respectively) and the cell membrane permeability to the intermediate at (A) external  
 46 substrate concentration  $S_{ext} = 50$  mM and (B)  $S_{ext} = 0.5$  mM. Regions of parameter space  
 47 are colored by the optimal organization strategy in that region: organelle (blue); scaffold  
 48 (orange); or no organization (grey). The analysis is identical to that of Fig. 3F, except that  
 49 the baseline model parameters (excluding those varied in the phase space) are set to those  
 50 of the mevalonate biosynthetic pathway, not the Pdu MCP system.



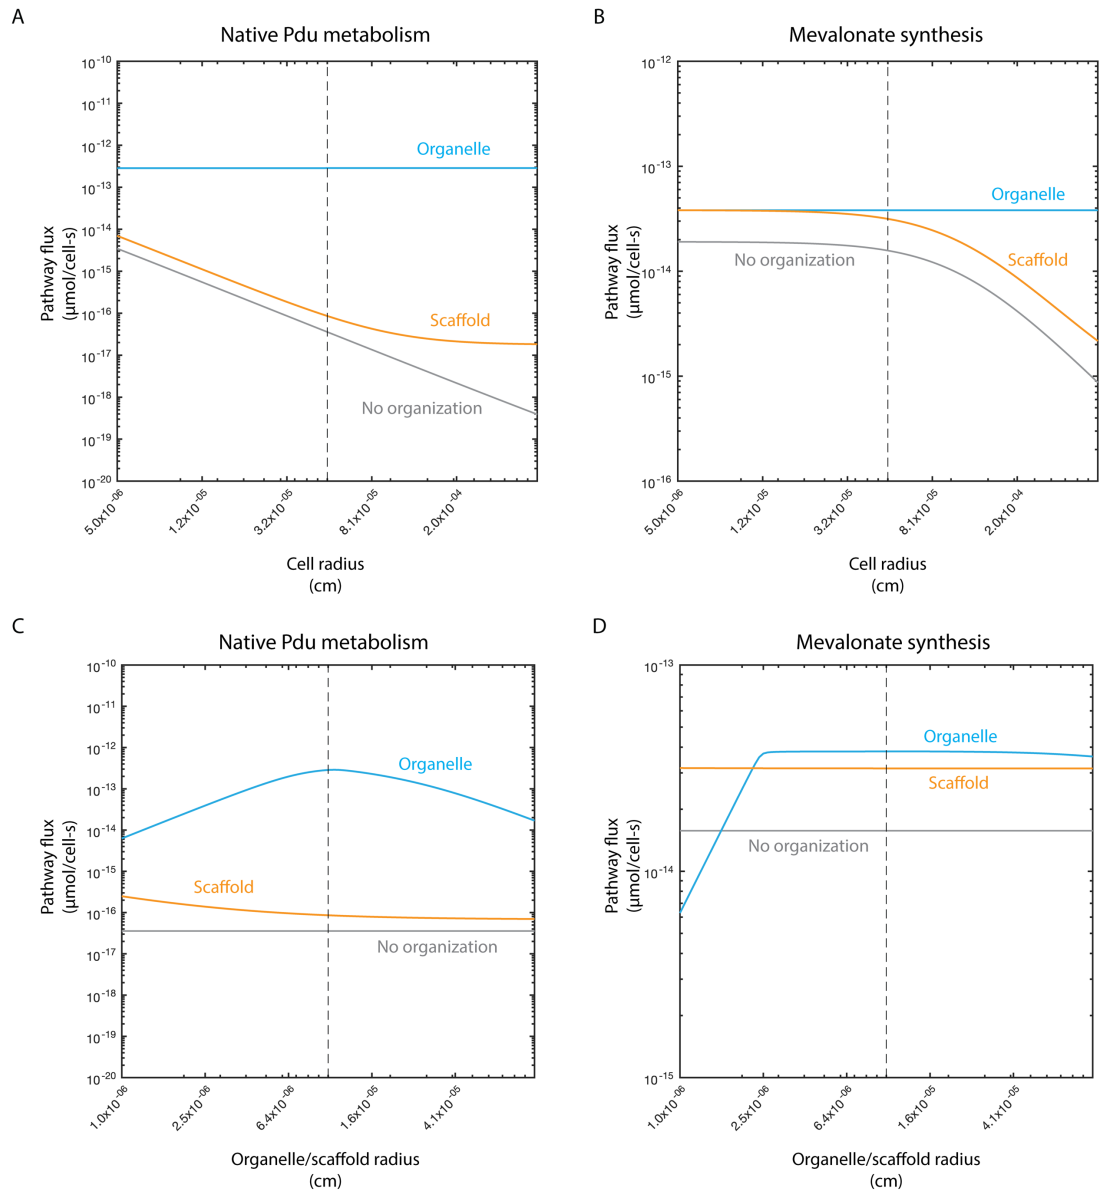

51

52 **Figure S6.** Predicted flux for (A) native Pdu microcompartment metabolism and (B)

53 mevalonate biosynthesis without organization (grey); with organization on a scaffold

54 (orange); and with organization in an organelle (blue) as a function of cell radius  $R_b$ .

55 Predicted flux for (C) native Pdu microcompartment metabolism and (D) mevalonate

56 biosynthesis without organization (grey); with organization on a scaffold (orange); and

- 57 with organization in an organelle (blue) as a function of organelle/scaffold radius  $R_c$ .
- 58 Baseline parameter values are shown with a black dashed line.

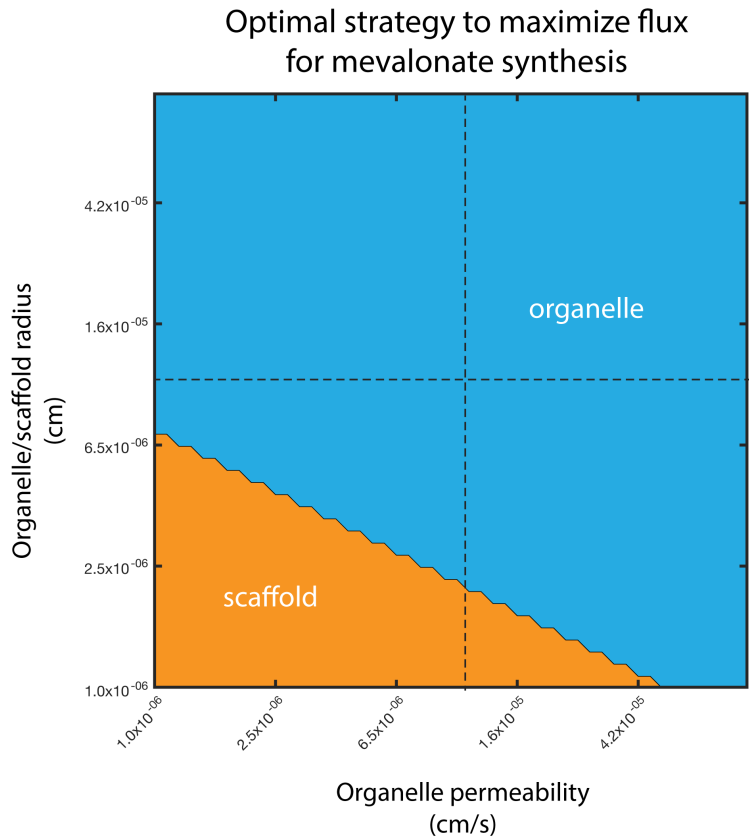

59

60 **Figure S7.** Recommended organization strategy resulting in maximum pathway flux for  
 61 mevalonate biosynthesis as a function of organelle permeability and organelle/scaffold  
 62 radius. Regions of parameter space are colored by the optimal organization strategy in  
 63 that region: organelle (blue); scaffold (orange); or no organization (grey). Baseline  
 64 parameter values are shown with a black dashed line.

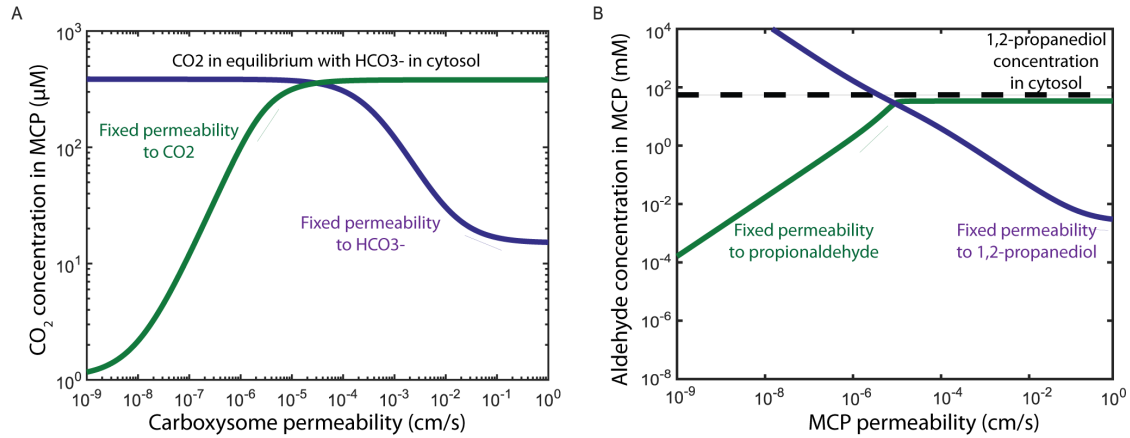

65

66 **Figure S8.** Intermediate concentration in (A) the carboxysome and (B) the Pdu  
 67 microcompartment as a function of (A) carboxysome permeability and (B)  
 68 microcompartment permeability. Intermediate concentration is shown in (A) with fixed  
 69 permeability to CO<sub>2</sub> (green) and fixed permeability to HCO<sub>3</sub><sup>-</sup> (purple) and in (B) with  
 70 fixed permeability to propionaldehyde (green) and fixed permeability to 1,2-propanediol  
 71 (purple). Reproduced from Jakobson et al., 2017; Mangan and Brenner, 2014.

72
